# Supplementary material for: RNA targeting unleashes indiscriminate nuclease activity of CRISPR–Cas12a2
Source: PubMed Central journal article supplement (PMC9849127; doi:10.1038/s41586-022-05560-w), 2023-01-04
Supplement: 41586_2022_5560_MOESM1_ESM.pdf [file 41586_2022_5560_MOESM1_ESM.pdf]

## Supplementary information

---

# RNA targeting unleashes indiscriminate nuclease activity of CRISPR–Cas12a2

---

In the format provided by the authors and unedited

## Supplementary Information

### RNA targeting unleashes indiscriminate nuclease activity of CRISPR-Cas12a2

Jack P. K. Bravo, Thomson Hallmark, Bronson Naegle, Chase L. Beisel, Ryan N. Jackson, David W. Taylor

#### Table of Contents

|                                                                                |   |
|--------------------------------------------------------------------------------|---|
| <b>Supplementary Figure 1   Source data.</b> Raw data for all gels.            | 1 |
| <b>Supplementary Table 1   Strains, plasmids, and nucleic acid substrates.</b> | 4 |

**Supplementary Video 1 | Structural rearrangements in Cas12a2.** Cas12a2 binary complex coloured as in **Fig. 1**. Morph to ternary complex, upon binding of target strand (orange). Rotation showing the crRNA:TS duplex running through the centre of the complex. RuvC active site, with collateral dsDNA bound (purple and green). Zoom-in on the two aromatic clamp pairs (non-cleaved strand and then cleaved strand).

**Figure 1. Source data.** Raw data for all gels.

Raw data for Fig. 2g.

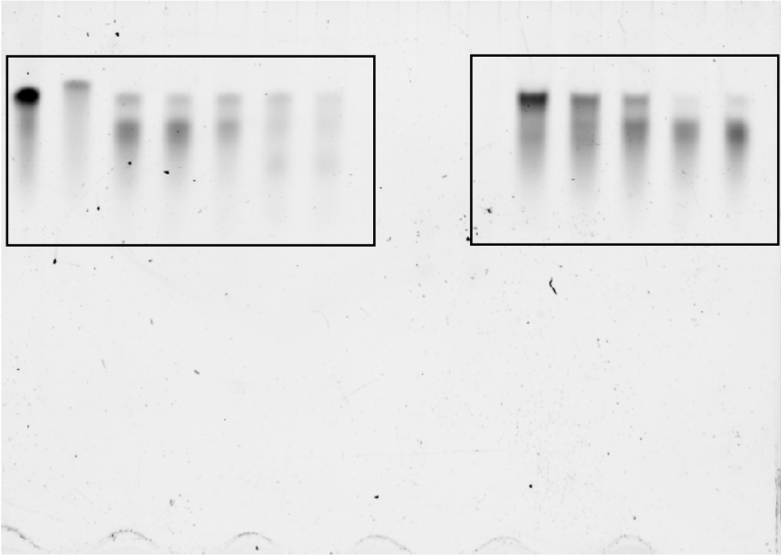

Sybr gold staining

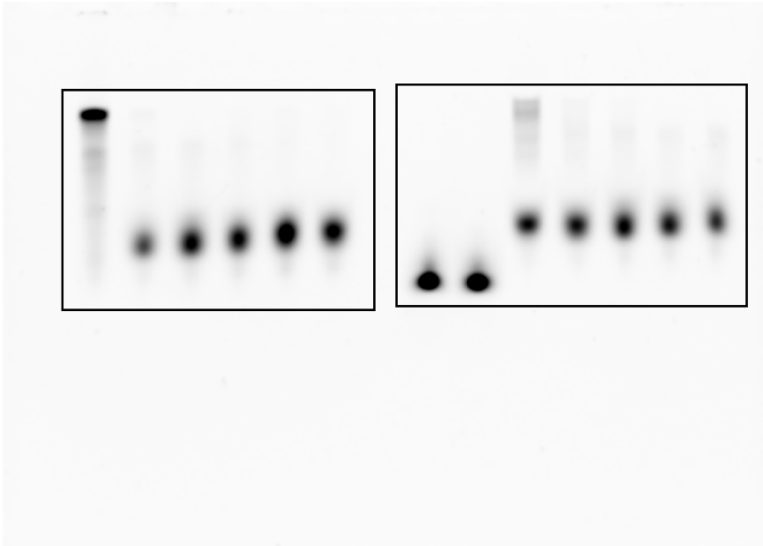

Fluorescence from FAM label

Raw data for Fig. 3h.

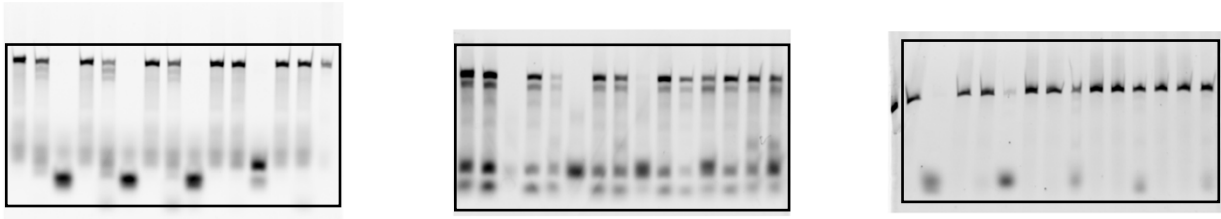

Left to right. ssDNA, ssRNA, dsDNA.

Raw data for Extended Data Fig. 4e.

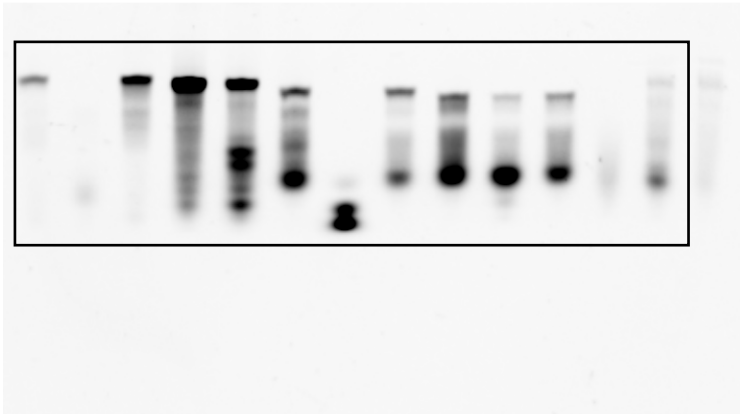

Raw data for Extended Fig. 8b.

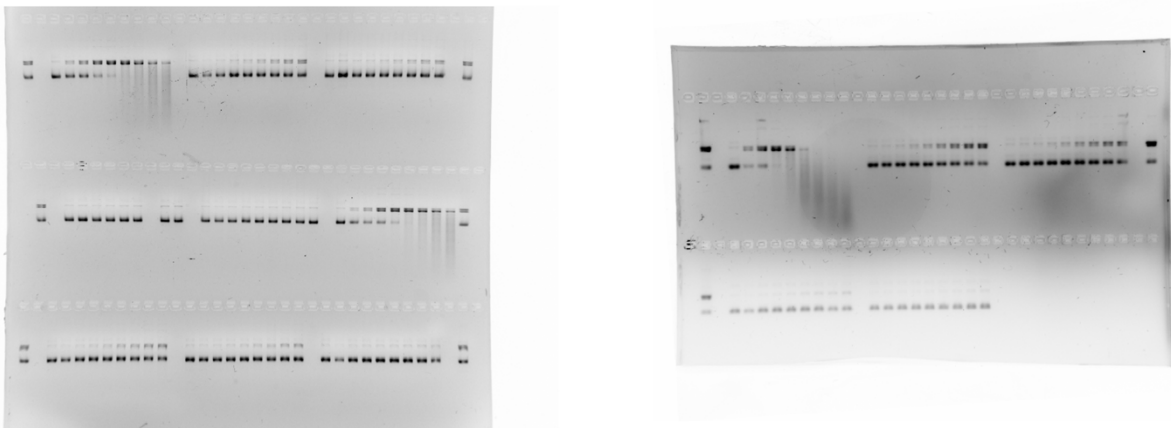

Raw data for Extended Data Fig. 9.

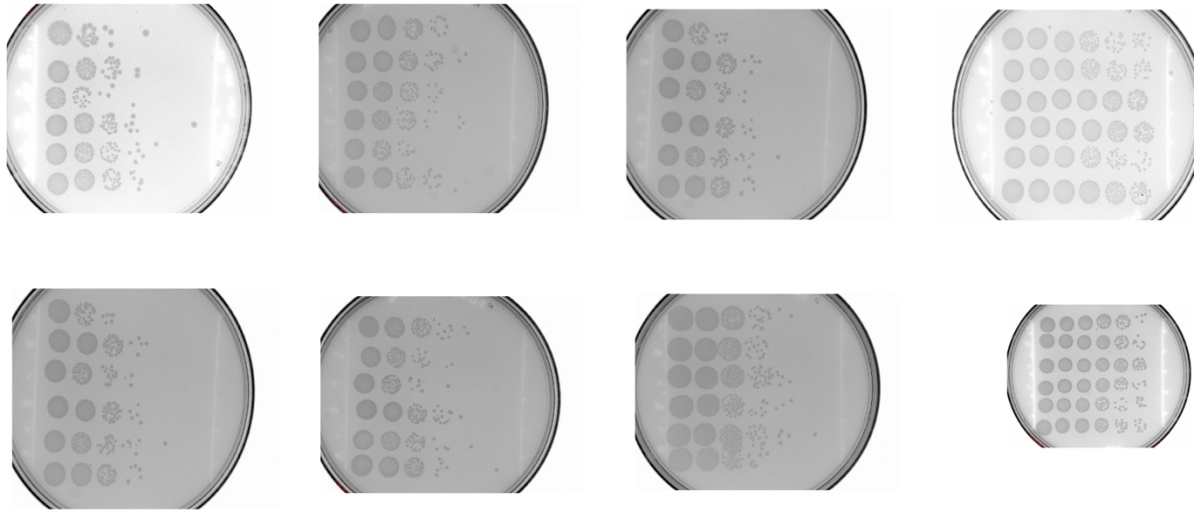

Top (left to right). E1063A, Y465A, Y1080A, Y465A/Y1080A  
Bottom (left to right). Y1069A, F1092A, Y1069A/F1092A,  $\Delta$ PI

**Table 1. Strains, plasmids, and nucleic acid substrates.**

| Substrate                  | Abrv.           | Sequence                                                                                     | FAM |
|----------------------------|-----------------|----------------------------------------------------------------------------------------------|-----|
| <b>Biochemistry</b>        |                 |                                                                                              |     |
| crRNA                      | CR              | 5'-<br>UAAAUUUCUACU AUUGUAGAUUGGAGCA<br>ACACCUGAAGGAAGGCUUGA-3'                              |     |
| Target Strand              | TS              | 5'-<br>UCUUUGCUGCCGCACUUGCUCAUCAAG<br>CCU,UCCUU,CAGGUGUUGCUCAGAAA<br>GGUGAGUUCUUCUUGUUGUU-3' | 5'  |
| Target Strand $\Delta$ PFS | TS $\Delta$ PFS | 5'-<br>UCUUUGCUGCCGCACUUGCUCAUCAAG<br>CCUCCUUCAGGUGUUGCUCCA-3'                               | 5'  |
| Target Strand -5           | TS-5            | 5'-<br>UCCUUCAGGUGUUGCUCAGAAAAGGUG<br>AGUUCUUCUUGUUGUU-3'                                    | 3'  |
| Target Strand -10          | TS-10           | 5'-<br>CAGGUGUUGCUCAGAAAAGGUGAGUUC<br>UUCUUGUUGUU-3'                                         | 3'  |
| Target Strand -9           | TS-9            | 5'-<br>UCAGGUGUUGCUCAGAAAAGGUGAGUU<br>CUUCUUGUUGUU-3'                                        | 3'  |
| Target Strand -8           | TS-8            | 5'-<br>UUCAGGUGUUGCUCAGAAAAGGUGAGU<br>UCUUCUUGUUGUU-3'                                       | 3'  |
| Nontarget RNA              | NT-RNA          | 5'-<br>CAGAGUAAGUGACGCGCGGCGAGUGG<br>CGCGCCACGUCGAAAUCUAGAGGCG-<br>3'                        | 5'  |
| Nontarget ssDNA            | NT-ssDNA        | 5'-<br>AACTGATATGACAATTGCGCGTAGCACG<br>ACGACGATATGACACTTGCGCATAACGA<br>CGACGATAACAATGAT-3'   | 5'  |
| Nontarget dsDNA            | NT-dsDNA        | 5'-AACTGATATGACAATTGCGCGTAGCA<br>3'-TTGACTATACTGTTAACGCGCATCGT                               | 5'  |

|                        |                                                   |                                                              |      |
|------------------------|---------------------------------------------------|--------------------------------------------------------------|------|
|                        |                                                   | CGACGACGATATGACACTTGCGCATAAC<br>GCTGCTGCTATACTGTGAACGCGTATTG |      |
|                        |                                                   | GACGACGATACAATGAT-3'<br>CTGCTGCTATGTTACTA-5'                 |      |
| <b>Structure</b>       |                                                   |                                                              |      |
| crRNA                  |                                                   |                                                              | None |
| Target Strand          |                                                   |                                                              | None |
| Target Strand - flanks | TS-F                                              |                                                              |      |
| PT Nontarget dsDNA     | PT-dsDNA                                          |                                                              | None |
|                        |                                                   |                                                              |      |
| <b>Plasmids</b>        |                                                   |                                                              |      |
| 1408                   | pACYC_SuCas12a2_3xcrRNA                           |                                                              |      |
| 1416                   | p__SuCas12a2                                      |                                                              |      |
| dPI mutant 2290        | pACYC_SuCas12a2( $\Delta$ a.a. 624 - 713)_3xcrRNA |                                                              |      |
| 2286                   | pACYC_SuCas12a2(Y465A)_3xcrRNA                    |                                                              |      |
| 2287                   | pACYC_SuCas12a2(Y1080A)_3xcrRNA                   |                                                              |      |
| 2379                   | pACYC_SuCas12a2(Y465A, Y1080A)_3xcrRNA            |                                                              |      |

|                  |                                         |                              |  |
|------------------|-----------------------------------------|------------------------------|--|
| 2247             | pACYC_SuCas12a2(Y1069A)_3xcrRNA         |                              |  |
| 2288             | pACYC_SuCas12a2(F1092A)_3xcrRNA         |                              |  |
| 2289             | pACYC_SuCas12a2(Y1069A, F1092A)_3xcrRNA |                              |  |
| 2270             | pACYC_SuCas12a2(R1180A)_3xcrRNA         |                              |  |
| 2271             | pACYC_SuCas12a2(D1184A)_3xcrRNA         |                              |  |
| 1412             | pACYC_SuCas12a2(E1063A)_3xcrRNA         |                              |  |
| Target(1094)     | pET27b(+)_Target_TTTC                   |                              |  |
| Non-target(1095) | pET27b(+)_non-Target_TTTC               |                              |  |
| <b>Primers</b>   |                                         |                              |  |
| Cas12a2(Y465A)F  |                                         | AGAAATCTTAgcTGGTAACACGATGTTC |  |
| Cas12a2(Y465A)R  |                                         | CAATTTGAAACTTATAAGAAGGATATAC |  |
| Cas12a2(Y1080A)F |                                         | TGATGGCAGAgcCCTTCCGTCATAAC   |  |
| Cas12a2(Y1080A)R |                                         | ACTTCACAAGACGAGGATG          |  |
| Cas12a2(Y1069A)F |                                         | TGCACCTCCAgcGGCTCTTGAC       |  |
| Cas12a2(Y1069A)R |                                         | AAGTCCGGTTATGACGGA           |  |
| Cas12a2(F1092A)F |                                         | CTGTTCCCTTGgcATCTACATCCTC    |  |
| Cas12a2(F1092A)R |                                         | CAGAATCAGATGCTTGCAG          |  |



|                                      |     |                                     |  |
|--------------------------------------|-----|-------------------------------------|--|
| Cas12a2(R1180A)F                     |     | AAATGTATACgcGGACAAGGATGACATCT<br>TG |  |
| Cas12a2(R1180A)R                     |     | GTTTTGCTACAGACGGGG                  |  |
| Cas12a2(D1184A)F                     |     | GACAAGGATGcCATCTTGGTTTG             |  |
| Cas12a2(D1184A)R                     |     | CCTGTATACATTTGTTTTGC                |  |
| Cas12a2( $\Delta$ a.a.624 -<br>713)F | dPI | GCTTGTAAGGCTCTTAAC                  |  |
| Cas12a2( $\Delta$ a.a.624 -<br>713)R | dPI | TCATATTTGCTGCAGAGC                  |  |
